# Supplementary material for: Clinical Utility of a Plasma Protein Classifier for Indeterminate Lung Nodules
Source: Springer Nature journal article supplement (doi:10.1007/s00408-015-9800-0), 2015-09-16
Supplement: MOESM2 [file 8444060]

Title Page

Clinical Utility of a Plasma Protein Classifier for Indeterminate Lung Nodules

Anil Vachani<sup>1</sup>; Zane Hammoud<sup>2</sup>; Steven Springmeyer<sup>7</sup>; Neri Cohen<sup>3</sup>; Dao Nguyen<sup>4</sup>; Christina Williamson<sup>5</sup>; Sandra Starnes<sup>6</sup>; Stephen Hunsucker<sup>7</sup>; Scott Law<sup>7</sup>; Xiao-Jun Li<sup>7</sup>; Alexander Porter<sup>7</sup>; Paul Kearney<sup>7</sup>

<sup>1</sup> Pulmonary, Allergy, and Critical Care Division, Perelman School of Medicine, University of Pennsylvania/Abramson Research Center, 3615 Civic Center Boulevard, Suite 1016E, Philadelphia, PA 19104

<sup>2</sup>Henry Ford Hospital, 2799 W. Grand Blvd., Detroit, MI 48202

<sup>3</sup>Greater Baltimore Medical Center, 6569 North Charles Street, Suite 701, Baltimore, MD 21204

<sup>4</sup>Sylvester Comprehensive Cancer Center, University of Miami Hospital & Clinics, 1550 NW 10th Avenue, Fox Building, Suite 308, Office 314, Miami, FL 33136

<sup>5</sup>Lahey Hospital & Medical Center, Department of Thoracic and Cardiovascular Surgery, 41 Mall Road, Burlington, MA 01805

<sup>6</sup>University of Cincinnati, 231 Albert Sabin Way, Cincinnati, OH 45267-0562

<sup>7</sup>Integrated Diagnostics, 818 Stewart St., Suite 1101, Seattle, WA, 98101

Address Correspondence:

Paul Kearney, Ph.D.

Integrated Diagnostics

818 Stewart St., Suite 1101

Seattle, WA 98101

Email: pkearney@indidx.com

Phone: 206-576-6311

Fax: 206-576-6350

| Age | Sex    | Smoking   | Pack-<br>Year | Nodu | Adjudicated Pro | Primary | Xpresys Result |
|-----|--------|-----------|---------------|------|-----------------|---------|----------------|
| 74  | Male   | Former    | 60            | 12   | Surgery Only    | NSCLC   | Indeterminate  |
| 71  | Female | Never     | NA            | 25   | Surgery Only    | NSCLC   | Likely Benign  |
| 68  | Male   | Current   | 42            | 22   | Surgery Only    | NSCLC   | Indeterminate  |
| 74  | Female | Never     | NA            | 30   | Biopsy Only     | NSCLC   | Likely Benign  |
| 66  | Female | Former    | 40            | 24   | Biopsy Only     | Benign  | Indeterminate  |
| 67  | Male   | Former    | 71            | 27   | Biopsy & Surger | NSCLC   | Indeterminate  |
| 81  | Male   | Current   | 47            | 21   | Biopsy Only     | Benign  | Indeterminate  |
| 62  | Female | Former    | 20            | 20   | Surgery Only    | NSCLC   | Indeterminate  |
| 63  | Female | Never     | NA            | 27   | Biopsy & Surger | NSCLC   | Indeterminate  |
| 66  | Male   | Never     | NA            | 10   | Surgery Only    | Benign  | Likely Benign  |
| 76  | Female | Former    | 69            | 20   | Biopsy & Surger | NSCLC   | Likely Benign  |
| 75  | Male   | Former    | 57            | 20   | Biopsy & Surger | NSCLC   | Indeterminate  |
| 76  | Female | Former    | 22            | 27   | Biopsy & Surger | NSCLC   | Indeterminate  |
| 82  | Female | Never     | NA            | 16   | Biopsy Only     | NSCLC   | Indeterminate  |
| 81  | Female | Never     | NA            | 20   | Biopsy & Surger | NSCLC   | Indeterminate  |
| 79  | Male   | Never     | NA            | 30   | Surgery Only    | NSCLC   | Indeterminate  |
| 58  | Female | Former    | 20            | 8    | Biopsy & Surger | NSCLC   | Indeterminate  |
| 81  | Male   | Never     | NA            | 20   | Biopsy Only     | Benign  | Likely Benign  |
| 65  | Female | Never     | NA            | 27   | Biopsy & Surger | NSCLC   | Indeterminate  |
| 65  | Male   | Former    | 43            | 12   | Biopsy Only     | NSCLC   | Indeterminate  |
| 73  | Female | Never     | NA            | 26   | Surgery Only    | NSCLC   | Indeterminate  |
| 68  | Female | Former    | 25            | 24   | Surgery Only    | NSCLC   | Indeterminate  |
| 58  | Female | Never     | NA            | 29   | Biopsy & Surger | NSCLC   | Indeterminate  |
| 69  | Female | Current   | 27            | 28   | Biopsy Only     | Benign  | Likely Benign  |
| 68  | Female | Current   | 20            | 12   | Biopsy & Surger | NSCLC   | Indeterminate  |
| 72  | Male   | Former    | 40            | 24   | Biopsy Only     | NSCLC   | Indeterminate  |
| 59  | Female | Former    | 20            | 27   | Surgery Only    | NSCLC   | Likely Benign  |
| 76  | Male   | Former    | 45            | 20   | Surgery Only    | NSCLC   | Indeterminate  |
| 57  | Male   | Former    | 74            | 20   | Biopsy & Surger | NSCLC   | Indeterminate  |
| 77  | Female | Former    | 11            | 18   | Surgery Only    | NSCLC   | Indeterminate  |
| 82  | Female | Never     | NA            | 15   | Surgery Only    | NSCLC   | Indeterminate  |
| 79  | Female | Former    | 21            | 30   | Surgery Only    | Benign  | Likely Benign  |
| 55  | Female | Current   | 56            | 12   | Surgery Only    | NSCLC   | Indeterminate  |
| 76  | Female | Passive E | NA            | 14   | Surgery Only    | NSCLC   | Indeterminate  |
| 74  | Male   | Former    | 30            | 28   | Biopsy Only     | NSCLC   | Indeterminate  |
| 75  | Male   | Former    | 40            | 26   | Surgery Only    | NSCLC   | Indeterminate  |
| 65  | Female | Former    | 20            | 15   | Surgery Only    | NSCLC   | Indeterminate  |
| 77  | Male   | Former    | 35            | 8    | Surgery Only    | NSCLC   | Indeterminate  |
| 65  | Female | Never     | NA            | 30   | Surgery Only    | NSCLC   | Indeterminate  |
| 77  | Female | Former    | 80            | 18   | Surgery Only    | NSCLC   | Indeterminate  |

|    |        |           |    |    |              |        |               |
|----|--------|-----------|----|----|--------------|--------|---------------|
| 64 | Male   | Current   | 75 | 21 | Biopsy Only  | NSCLC  | Indeterminate |
| 84 | Male   | Former    | 36 | 27 | Surgery Only | NSCLC  | Indeterminate |
| 60 | Male   | Former    | 70 | 20 | Surgery Only | NSCLC  | Likely Benign |
| 64 | Female | Passive E | NA | 12 | Biopsy Only  | Benign | Likely Benign |
| 63 | Male   | Never     | NA | 21 | Biopsy Only  | Benign | Likely Benign |
| 66 | Female | Current   | 40 | 11 | Surgery Only | NSCLC  | Indeterminate |
| 65 | Female | Never     | NA | 17 | Surgery Only | NSCLC  | Indeterminate |
| 48 | Male   | Former    | 30 | 8  | Surgery Only | Benign | Likely Benign |
| 70 | Female | Former    | 52 | 14 | Surgery Only | NSCLC  | Indeterminate |
| 72 | Male   | Former    | 8  | 12 | Surgery Only | NSCLC  | Indeterminate |
| 54 | Female | Never     | NA | 11 | Surgery Only | NSCLC  | Indeterminate |
| 91 | Male   | Former    | 70 | 27 | Biopsy Only  | NSCLC  | Indeterminate |
| 65 | Female | Former    | 40 | 20 | Surgery Only | NSCLC  | Indeterminate |
| 58 | Female | Former    | 20 | 22 | Surgery Only | NSCLC  | Indeterminate |
| 69 | Male   | Former    | 20 | 14 | Surgery Only | NSCLC  | Indeterminate |
| 71 | Female | Former    | 51 | 28 | Surgery Only | NSCLC  | Likely Benign |
| 70 | Female | Former    | 4  | 13 | Surgery Only | NSCLC  | Indeterminate |
| 61 | Male   | Never     | NA | 11 | Surgery Only | Benign | Likely Benign |
| 73 | Female | Never     | NA | 15 | Surgery Only | NSCLC  | Likely Benign |
| 52 | Male   | Never     | NA | 23 | Surgery Only | Benign | Indeterminate |
| 71 | Female | Former    | 45 | 20 | Surgery Only | NSCLC  | Indeterminate |
| 76 | Male   | Former    | 50 | 14 | Surgery Only | NSCLC  | Likely Benign |
| 72 | Male   | Former    | 10 | 14 | Surgery Only | Benign | Indeterminate |
| 59 | Male   | Current   | 60 | 16 | Surgery Only | NSCLC  | Indeterminate |
| 49 | Female | Never     | NA | 16 | Surgery Only | NSCLC  | Likely Benign |
| 64 | Female | Former    | 14 | 8  | Surgery Only | NSCLC  | Indeterminate |
| 63 | Male   | Former    | 50 | 14 | Surgery Only | Benign | Likely Benign |
| 83 | Female | Former    | 5  | 16 | Surgery Only | Benign | Indeterminate |
| 73 | Male   | Former    | 60 | 21 | Surgery Only | NSCLC  | Indeterminate |
| 61 | Male   | Never     | NA | 25 | Surgery Only | NSCLC  | Indeterminate |
| 72 | Female | Never     | NA | 18 | Surgery Only | NSCLC  | Indeterminate |
| 68 | Male   | Former    | 18 | 24 | Surgery Only | NSCLC  | Indeterminate |
| 86 | Male   | Former    | 60 | 18 | Surgery Only | NSCLC  | Indeterminate |
| 59 | Female | Never     | NA | 20 | Surgery Only | NSCLC  | Likely Benign |
| 65 | Male   | Former    | 23 | 22 | Biopsy Only  | NSCLC  | Likely Benign |
| 56 | Male   | Former    | 40 | 10 | Surgery Only | NSCLC  | Indeterminate |
| 76 | Male   | Former    | 80 | 20 | Biopsy Only  | NSCLC  | Likely Benign |
| 83 | Male   | Former    | 40 | 23 | Surgery Only | NSCLC  | Likely Benign |
| 79 | Female | Former    | 20 | 28 | Surgery Only | NSCLC  | Likely Benign |
| 79 | Male   | Former    | 45 | 20 | Surgery Only | NSCLC  | Indeterminate |
| 66 | Female | Former    | 40 | 28 | Surgery Only | NSCLC  | Likely Benign |
| 83 | Male   | Former    | 45 | 16 | Surgery Only | Benign | Indeterminate |

|    |        |           |     |    |              |        |               |
|----|--------|-----------|-----|----|--------------|--------|---------------|
| 71 | Male   | Former    | 5   | 18 | Surgery Only | NSCLC  | Indeterminate |
| 78 | Female | Current   | 50  | 23 | Biopsy Only  | NSCLC  | Indeterminate |
| 64 | Male   | Former    | 60  | 10 | Biopsy Only  | NSCLC  | Indeterminate |
| 74 | Female | Former    | 20  | 11 | Biopsy Only  | Benign | Indeterminate |
| 66 | Male   | Former    | 45  | 20 | Surgery Only | NSCLC  | Indeterminate |
| 67 | Female | Current   | 75  | 20 | Surgery Only | NSCLC  | Indeterminate |
| 56 | Female | Former    | 45  | 19 | Surgery Only | NSCLC  | Indeterminate |
| 73 | Male   | Former    | 90  | 22 | Surgery Only | NSCLC  | Indeterminate |
| 77 | Female | Former    | 10  | 15 | Surgery Only | NSCLC  | Indeterminate |
| 73 | Female | Former    | 84  | 12 | Surgery Only | NSCLC  | Indeterminate |
| 56 | Female | Never     | NA  | 16 | Surgery Only | NSCLC  | Indeterminate |
| 80 | Female | Former    | 20  | 24 | Biopsy Only  | NSCLC  | Indeterminate |
| 73 | Female | Former    | 20  | 24 | Surgery Only | NSCLC  | Indeterminate |
| 70 | Female | Never     | NA  | 13 | Surgery Only | NSCLC  | Indeterminate |
| 52 | Female | Former    | 10  | 13 | Surgery Only | Benign | Indeterminate |
| 70 | Female | Former    | 45  | 17 | Surgery Only | NSCLC  | Indeterminate |
| 70 | Female | Former    | 45  | 17 | Surgery Only | NSCLC  | Indeterminate |
| 70 | Male   | Former    | 64  | 16 | Surgery Only | NSCLC  | Likely Benign |
| 76 | Male   | Former    | 83  | 16 | Biopsy Only  | NSCLC  | Indeterminate |
| 76 | Male   | Former    | 60  | 26 | Surgery Only | NSCLC  | Indeterminate |
| 65 | Female | Never     | NA  | 9  | Surgery Only | Benign | Indeterminate |
| 70 | Female | Never     | NA  | 12 | Surgery Only | NSCLC  | Indeterminate |
| 65 | Male   | Former    | 100 | 30 | Surgery Only | NSCLC  | Indeterminate |
| 62 | Male   | Former    | 56  | 23 | Surgery Only | NSCLC  | Indeterminate |
| 70 | Male   | Former    | 30  | 23 | Surgery Only | NSCLC  | Likely Benign |
| 81 | Female | Former    | 20  | 15 | Surgery Only | NSCLC  | Likely Benign |
| 57 | Male   | Current   | 40  | 10 | Surgery Only | Benign | Indeterminate |
| 72 | Female | Former    | 60  | 27 | Surgery Only | NSCLC  | Likely Benign |
| 72 | Female | Current   | 40  | 18 | Biopsy Only  | Benign | Likely Benign |
| 74 | Male   | Current   | 29  | 16 | Biopsy Only  | NSCLC  | Indeterminate |
| 56 | Male   | Current   | 20  | 17 | Surgery Only | NSCLC  | Indeterminate |
| 61 | Male   | Former    | 70  | 18 | Surgery Only | Benign | Likely Benign |
| 71 | Male   | Never     | NA  | 11 | Surgery Only | NSCLC  | Indeterminate |
| 76 | Female | Passive E | NA  | 13 | Surgery Only | NSCLC  | Indeterminate |
| 77 | Female | Former    | 25  | 23 | Surgery Only | NSCLC  | Likely Benign |
| 68 | Male   | Former    | 10  | 20 | Surgery Only | NSCLC  | Likely Benign |
| 69 | Male   | Current   | 50  | 20 | Surgery Only | NSCLC  | Indeterminate |
| 68 | Male   | Former    | 75  | 18 | Surgery Only | NSCLC  | Likely Benign |
| 66 | Female | Never     | NA  | 17 | Surgery Only | NSCLC  | Indeterminate |
| 72 | Male   | Former    | 37  | 20 | Surgery Only | NSCLC  | Indeterminate |
| 61 | Female | Former    | 105 | 14 | Surgery Only | NSCLC  | Indeterminate |
| 92 | Male   | Former    | 15  | 26 | Surgery Only | NSCLC  | Indeterminate |

|    |        |           |     |    |                 |        |               |
|----|--------|-----------|-----|----|-----------------|--------|---------------|
| 55 | Female | Former    | 30  | 12 | Biopsy Only     | NSCLC  | Indeterminate |
| 67 | Male   | Former    | 80  | 18 | Surgery Only    | NSCLC  | Likely Benign |
| 71 | Male   | Former    | 80  | 16 | Surgery Only    | NSCLC  | Likely Benign |
| 70 | Male   | Former    | NA  | 16 | Surgery Only    | Benign | Likely Benign |
| 73 | Female | Former    | 15  | 13 | Biopsy Only     | Benign | Indeterminate |
| 68 | Male   | Former    | 115 | 22 | Surgery Only    | NSCLC  | Indeterminate |
| 59 | Male   | Former    | 20  | 30 | Biopsy Only     | NSCLC  | Likely Benign |
| 57 | Female | Current   | 41  | 12 | Surgery Only    | NSCLC  | Indeterminate |
| 68 | Female | Current   | 52  | 21 | Surgery Only    | Benign | Indeterminate |
| 67 | Male   | Former    | 40  | 13 | Surgery Only    | NSCLC  | Likely Benign |
| 59 | Male   | Former    | 11  | 25 | Surgery Only    | NSCLC  | Likely Benign |
| 54 | Female | Current   | 36  | 17 | Surgery Only    | NSCLC  | Indeterminate |
| 64 | Male   | Former    | 51  | 18 | Surgery Only    | NSCLC  | Indeterminate |
| 50 | Female | Former    | 23  | 15 | Biopsy & Surger | NSCLC  | Indeterminate |
| 68 | Male   | Former    | 28  | 17 | Biopsy & Surger | NSCLC  | Indeterminate |
| 74 | Female | Current   | 27  | 22 | Biopsy & Surger | NSCLC  | Indeterminate |
| 72 | Female | Former    | 36  | 11 | Surgery Only    | NSCLC  | Indeterminate |
| 60 | Female | Current   | 43  | 11 | Biopsy & Surger | NSCLC  | Indeterminate |
| 53 | Female | Current   | 40  | 15 | Surgery Only    | NSCLC  | Likely Benign |
| 56 | Female | Current   | 39  | 23 | Surgery Only    | NSCLC  | Indeterminate |
| 67 | Male   | Former    | 27  | 20 | Surgery Only    | NSCLC  | Indeterminate |
| 57 | Female | Current   | 40  | 26 | Biopsy & Surger | NSCLC  | Indeterminate |
| 71 | Female | Passive E | NA  | 21 | Surgery Only    | NSCLC  | Indeterminate |
| 78 | Female | Passive E | NA  | 11 | Surgery Only    | Benign | Indeterminate |
| 47 | Female | Current   | 15  | 22 | Surgery Only    | NSCLC  | Indeterminate |
| 58 | Female | Former    | 26  | 13 | Surgery Only    | Benign | Indeterminate |
| 89 | Male   | Former    | 50  | 22 | Biopsy & Surger | NSCLC  | Indeterminate |
| 49 | Female | Current   | 48  | 11 | Biopsy & Surger | NSCLC  | Indeterminate |
| 61 | Female | Former    | 45  | 13 | Biopsy & Surger | NSCLC  | Indeterminate |
| 62 | Female | Current   | 35  | 28 | Biopsy Only     | Benign | Indeterminate |
| 82 | Male   | Former    | 80  | 24 | Biopsy Only     | Benign | Indeterminate |
| 84 | Male   | Former    | 12  | 25 | Biopsy & Surger | NSCLC  | Indeterminate |
| 65 | Male   | Former    | 44  | 22 | Biopsy & Surger | NSCLC  | Indeterminate |
| 70 | Male   | Current   | 15  | 25 | Biopsy & Surger | NSCLC  | Indeterminate |
| 67 | Male   | Current   | 46  | 13 | Biopsy & Surger | NSCLC  | Indeterminate |
| 85 | Male   | Former    | 80  | 22 | Surgery Only    | NSCLC  | Likely Benign |
| 79 | Female | Former    | 30  | 11 | Biopsy & Surger | NSCLC  | Likely Benign |
| 69 | Male   | Former    | 30  | 14 | Biopsy & Surger | NSCLC  | Indeterminate |
| 53 | Male   | Former    | 120 | 16 | Biopsy Only     | Benign | Indeterminate |
| 53 | Female | Current   | 14  | 23 | Biopsy Only     | NSCLC  | Indeterminate |
| 75 | Male   | Former    | 35  | 19 | Biopsy & Surger | NSCLC  | Likely Benign |
| 84 | Female | Former    | 40  | 22 | Biopsy & Surger | NSCLC  | Indeterminate |

|    |        |         |     |    |                 |        |               |
|----|--------|---------|-----|----|-----------------|--------|---------------|
| 56 | Female | Current | 38  | 8  | Surgery Only    | NSCLC  | Indeterminate |
| 87 | Male   | Former  | 98  | 18 | Biopsy Only     | NSCLC  | Indeterminate |
| 69 | Female | Former  | 21  | 24 | Surgery Only    | NSCLC  | Indeterminate |
| 65 | Male   | Former  | 32  | 9  | Surgery Only    | NSCLC  | Indeterminate |
| 59 | Female | Current | 42  | 13 | Biopsy & Surger | NSCLC  | Indeterminate |
| 49 | Female | Former  | 0.8 | 27 | Biopsy & Surger | NSCLC  | Indeterminate |
| 72 | Female | Former  | 40  | 8  | Biopsy & Surger | NSCLC  | Indeterminate |
| 59 | Female | Never   | NA  | 11 | Biopsy Only     | Benign | Indeterminate |
| 77 | Male   | Former  | 56  | 24 | Biopsy Only     | NSCLC  | Indeterminate |
| 73 | Female | Current | 31  | 22 | Surgery Only    | NSCLC  | Indeterminate |
| 67 | Male   | Current | 50  | 18 | Biopsy Only     | Benign | Indeterminate |
| 82 | Male   | Former  | 56  | 25 | Biopsy & Surger | NSCLC  | Likely Benign |
| 88 | Female | Former  | 1.5 | 26 | Surgery Only    | NSCLC  | Indeterminate |
| 60 | Female | Former  | 41  | 13 | Surgery Only    | NSCLC  | Likely Benign |
| 90 | Female | Never   | NA  | 12 | Biopsy Only     | NSCLC  | Likely Benign |
| 81 | Female | Never   | NA  | 30 | Biopsy & Surger | NSCLC  | Indeterminate |
| 51 | Female | Current | 35  | 13 | Surgery Only    | Benign | Likely Benign |
| 77 | Female | Never   | NA  | 25 | Biopsy & Surger | NSCLC  | Likely Benign |
| 59 | Female | Never   | NA  | 13 | Biopsy Only     | NSCLC  | Likely Benign |
| 52 | Female | Former  | 40  | 20 | Biopsy & Surger | NSCLC  | Indeterminate |
| 69 | Female | Former  | 55  | 13 | Surgery Only    | NSCLC  | Indeterminate |
| 78 | Female | Current | 60  | 21 | Biopsy & Surger | NSCLC  | Indeterminate |
| 80 | Female | Former  | 40  | 11 | Biopsy & Surger | NSCLC  | Indeterminate |
| 72 | Male   | Former  | 47  | 14 | Biopsy & Surger | NSCLC  | Indeterminate |
| 77 | Male   | Former  | 65  | 15 | Biopsy & Surger | Benign | Indeterminate |
| 63 | Male   | Former  | 25  | 28 | Surgery Only    | Benign | Indeterminate |
| 49 | Female | Former  | 20  | 12 | Surgery Only    | Benign | Likely Benign |
| 85 | Male   | Former  | 20  | 15 | Surgery Only    | NSCLC  | Indeterminate |
| 58 | Male   | Never   | NA  | 13 | Biopsy & Surger | NSCLC  | Indeterminate |
| 73 | Male   | Former  | 35  | 22 | Biopsy & Surger | NSCLC  | Indeterminate |
| 73 | Male   | Former  | 60  | 13 | Biopsy & Surger | NSCLC  | Likely Benign |
| 62 | Female | Never   | NA  | 27 | Surgery Only    | Benign | Likely Benign |
| 57 | Female | Former  | 25  | 18 | Surgery Only    | NSCLC  | Likely Benign |
| 81 | Female | Former  | 40  | 8  | Surgery Only    | NSCLC  | Likely Benign |
| 77 | Male   | Former  | 80  | 14 | Biopsy & Surger | NSCLC  | Indeterminate |
| 61 | Male   | Current | 19  | 18 | Biopsy & Surger | NSCLC  | Indeterminate |
| 83 | Male   | Former  | 15  | 15 | Surgery Only    | NSCLC  | Likely Benign |
| 56 | Female | Former  | 30  | 10 | Surgery Only    | NSCLC  | Indeterminate |
| 68 | Female | Never   | NA  | 14 | Surgery Only    | NSCLC  | Likely Benign |
| 66 | Female | Former  | 44  | 10 | Surgery Only    | NSCLC  | Indeterminate |
| 62 | Female | Never   | NA  | 17 | Surgery Only    | NSCLC  | Indeterminate |
| 72 | Male   | Former  | 63  | 22 | Surgery Only    | NSCLC  | Likely Benign |

|    |        |           |     |    |                 |        |               |
|----|--------|-----------|-----|----|-----------------|--------|---------------|
| 63 | Male   | Former    | 36  | 14 | Biopsy & Surger | NSCLC  | Indeterminate |
| 66 | Male   | Current   | 30  | 23 | Biopsy & Surger | NSCLC  | Indeterminate |
| 50 | Female | Current   | 20  | 12 | Surgery Only    | NSCLC  | Indeterminate |
| 61 | Male   | Former    | 60  | 16 | Biopsy & Surger | Benign | Indeterminate |
| 72 | Female | Current   | 74  | 17 | Biopsy Only     | NSCLC  | Indeterminate |
| 70 | Male   | Former    | 18  | 17 | Biopsy & Surger | NSCLC  | Indeterminate |
| 50 | Female | Current   | 120 | 20 | Biopsy & Surger | NSCLC  | Indeterminate |
| 67 | Female | Passive E | NA  | 20 | Surgery Only    | Benign | Indeterminate |
| 71 | Male   | Current   | 54  | 28 | Surgery Only    | NSCLC  | Indeterminate |
| 72 | Female | Former    | 10  | 18 | Biopsy & Surger | NSCLC  | Likely Benign |
| 49 | Male   | Current   | 15  | 20 | Biopsy & Surger | Benign | Indeterminate |
| 81 | Female | Passive E | NA  | 18 | Surgery Only    | NSCLC  | Likely Benign |
| 73 | Male   | Former    | 10  | 11 | Surgery Only    | NSCLC  | Indeterminate |
| 78 | Female | Former    | 40  | 28 | Surgery Only    | NSCLC  | Indeterminate |
| 50 | Female | Current   | 20  | 12 | Surgery Only    | NSCLC  | Indeterminate |
| 79 | Female | Never     | NA  | 23 | Biopsy & Surger | NSCLC  | Indeterminate |
| 70 | Female | Former    | 20  | 14 | Biopsy & Surger | NSCLC  | Indeterminate |
| 84 | Female | Former    | 35  | 22 | Surgery Only    | Benign | Indeterminate |
| 87 | Male   | Former    | 20  | 22 | Biopsy Only     | NSCLC  | Indeterminate |
| 53 | Male   | Current   | 20  | 22 | Biopsy & Surger | NSCLC  | Indeterminate |
| 72 | Male   | Former    | 68  | 24 | Surgery Only    | Benign | Likely Benign |
| 60 | Female | Former    | 4.5 | 22 | Biopsy & Surger | NSCLC  | Indeterminate |
| 53 | Female | Former    | 60  | 11 | Surgery Only    | NSCLC  | Indeterminate |
| 69 | Male   | Former    | 50  | 25 | Biopsy & Surger | NSCLC  | Indeterminate |
| 84 | Male   | Current   | 60  | 22 | Surgery Only    | NSCLC  | Indeterminate |
| 49 | Female | Former    | 25  | 20 | Biopsy & Surger | NSCLC  | Indeterminate |
| 63 | Male   | Current   | 25  | 27 | Surgery Only    | NSCLC  | Indeterminate |
| 53 | Male   | Current   | 10  | 26 | Biopsy & Surger | Benign | Indeterminate |
| 56 | Female | Current   | 24  | 21 | Surgery Only    | NSCLC  | Indeterminate |
| 60 | Female | Former    | 37  | 14 | Biopsy & Surger | Benign | Indeterminate |
| 68 | Male   | Never     | NA  | 29 | Surgery Only    | Benign | Indeterminate |
| 89 | Female | Former    | 8   | 28 | Biopsy Only     | NSCLC  | Indeterminate |
| 76 | Male   | Current   | 48  | 12 | Surgery Only    | NSCLC  | Indeterminate |
| 85 | Male   | Current   | 38  | 12 | Surgery Only    | NSCLC  | Indeterminate |
| 74 | Female | Former    | 1.5 | 28 | Surgery Only    | NSCLC  | Indeterminate |
| 67 | Male   | Former    | 15  | 8  | Surgery Only    | Benign | Likely Benign |
| 69 | Female | Current   | 105 | 11 | Surgery Only    | NSCLC  | Indeterminate |
| 76 | Male   | Current   | 30  | 23 | Surgery Only    | NSCLC  | Likely Benign |
| 60 | Female | Former    | 30  | 27 | Biopsy & Surger | NSCLC  | Likely Benign |
| 65 | Female | Never     | NA  | 29 | Surgery Only    | NSCLC  | Indeterminate |
| 69 | Female | Former    | 80  | 29 | Surgery Only    | NSCLC  | Indeterminate |
| 85 | Female | Current   | 89  | 13 | Biopsy & Surger | NSCLC  | Indeterminate |

|    |        |         |     |    |                 |        |               |
|----|--------|---------|-----|----|-----------------|--------|---------------|
| 69 | Female | Never   | NA  | 25 | Surgery Only    | Benign | Likely Benign |
| 83 | Male   | Former  | 32  | 24 | Biopsy & Surger | NSCLC  | Indeterminate |
| 54 | Female | Former  | 9.5 | 20 | Surgery Only    | NSCLC  | Indeterminate |
| 63 | Female | Former  | 50  | 27 | Biopsy & Surger | NSCLC  | Indeterminate |
| 75 | Female | Never   | NA  | 21 | Surgery Only    | NSCLC  | Indeterminate |
| 60 | Female | Former  | 43  | 8  | Surgery Only    | NSCLC  | Likely Benign |
| 71 | Female | Former  | 25  | 21 | Biopsy & Surger | NSCLC  | Likely Benign |
| 66 | Female | Former  | 45  | 15 | Biopsy & Surger | NSCLC  | Indeterminate |
| 63 | Female | Current | 82  | 17 | Biopsy & Surger | NSCLC  | Indeterminate |
| 50 | Female | Former  | 70  | 25 | Surgery Only    | Benign | Likely Benign |
| 66 | Male   | Current | 45  | 28 | Surgery Only    | NSCLC  | Indeterminate |
| 71 | Male   | Current | 38  | 13 | Surgery Only    | Benign | Indeterminate |
| 80 | Male   | Former  | 50  | 16 | Surgery Only    | NSCLC  | Indeterminate |
| 65 | Male   | Current | 25  | 23 | Surgery Only    | NSCLC  | Indeterminate |
| 64 | Female | Former  | 40  | 30 | Surgery Only    | NSCLC  | Indeterminate |
| 90 | Female | Never   | NA  | 29 | Surgery Only    | NSCLC  | Indeterminate |
| 63 | Female | Former  | 20  | 15 | Surgery Only    | NSCLC  | Indeterminate |
| 65 | Male   | Current | 138 | 17 | Surgery Only    | NSCLC  | Likely Benign |
| 71 | Female | Former  | 30  | 22 | Surgery Only    | Benign | Likely Benign |
| 51 | Female | Former  | 16  | 15 | Surgery Only    | NSCLC  | Likely Benign |
| 76 | Male   | Former  | 45  | 24 | Surgery Only    | NSCLC  | Indeterminate |
| 72 | Male   | Former  | 45  | 18 | Biopsy Only     | NSCLC  | Likely Benign |
| 66 | Male   | Former  | 40  | 15 | Surgery Only    | NSCLC  | Indeterminate |
| 63 | Female | Current | 30  | 17 | Surgery Only    | NSCLC  | Indeterminate |
| 64 | Male   | Current | 90  | 12 | Surgery Only    | NSCLC  | Indeterminate |
| 59 | Female | Current | 52  | 14 | Surgery Only    | NSCLC  | Likely Benign |
| 75 | Female | Former  | 20  | 10 | Biopsy Only     | NSCLC  | Likely Benign |
| 51 | Female | Former  | 76  | 14 | Biopsy & Surger | NSCLC  | Indeterminate |
| 56 | Male   | Current | 15  | 28 | Biopsy & Surger | NSCLC  | Indeterminate |
| 54 | Female | Current | 42  | 15 | Biopsy & Surger | NSCLC  | Likely Benign |
| 56 | Male   | Never   | NA  | 28 | Surgery Only    | NSCLC  | Indeterminate |
| 75 | Female | Former  | 40  | 18 | Biopsy & Surger | NSCLC  | Indeterminate |
| 79 | Male   | Former  | 1.5 | 14 | Surgery Only    | Benign | Indeterminate |
| 74 | Female | Former  | 7   | 13 | Surgery Only    | NSCLC  | Indeterminate |
| 66 | Female | Former  | 47  | 17 | Biopsy & Surger | NSCLC  | Indeterminate |
| 81 | Female | Former  | 50  | 25 | Surgery Only    | NSCLC  | Indeterminate |
| 64 | Female | Current | 50  | 14 | Surgery Only    | NSCLC  | Likely Benign |
| 76 | Male   | Current | 61  | 14 | Surgery Only    | NSCLC  | Indeterminate |
| 79 | Female | Current | 60  | 26 | Surgery Only    | NSCLC  | Indeterminate |
| 66 | Male   | Former  | 80  | 14 | Surgery Only    | NSCLC  | Indeterminate |
| 95 | Male   | Former  | 150 | 19 | Biopsy & Surger | NSCLC  | Likely Benign |
| 56 | Female | Never   | NA  | 19 | Biopsy & Surger | NSCLC  | Indeterminate |



|    |        |         |     |    |                 |        |               |
|----|--------|---------|-----|----|-----------------|--------|---------------|
| 68 | Male   | Former  | 45  | 24 | Biopsy & Surger | NSCLC  | Likely Benign |
| 50 | Male   | Never   | NA  | 30 | Surgery Only    | Benign | Indeterminate |
| 56 | Female | Current | 40  | 11 | Surgery Only    | NSCLC  | Indeterminate |
| 70 | Female | Current | 55  | 11 | Surgery Only    | NSCLC  | Indeterminate |
| 53 | Female | Current | 60  | 23 | Surgery Only    | Benign | Likely Benign |
| 64 | Female | Never   | NA  | 29 | Biopsy & Surger | NSCLC  | Indeterminate |
| 66 | Female | Former  | 11  | 14 | Surgery Only    | Benign | Indeterminate |
| 60 | Female | Current | 30  | 13 | Surgery Only    | NSCLC  | Indeterminate |
| 67 | Female | Current | 106 | 16 | Biopsy & Surger | NSCLC  | Indeterminate |
| 62 | Male   | Never   | NA  | 23 | Surgery Only    | NSCLC  | Indeterminate |
| 79 | Female | Former  | 25  | 25 | Surgery Only    | NSCLC  | Indeterminate |
| 71 | Male   | Current | 80  | 13 | Surgery Only    | NSCLC  | Indeterminate |
| 84 | Female | Former  | 10  | 22 | Biopsy Only     | Benign | Indeterminate |
| 78 | Female | Former  | 25  | 18 | Surgery Only    | NSCLC  | Indeterminate |
| 45 | Male   | Never   | NA  | 15 | Surgery Only    | NSCLC  | Likely Benign |
| 58 | Female | Former  | 40  | 20 | Surgery Only    | NSCLC  | Indeterminate |
| 54 | Male   | Former  | 15  | 20 | Surgery Only    | Benign | Indeterminate |
| 55 | Female | Former  | 40  | 9  | Biopsy & Surger | NSCLC  | Indeterminate |
| 63 | Female | Former  | 20  | 18 | Biopsy & Surger | Benign | Indeterminate |
| 54 | Male   | Former  | 14  | 30 | Surgery Only    | NSCLC  | Indeterminate |
| 66 | Male   | Former  | 25  | 19 | Surgery Only    | NSCLC  | Likely Benign |
| 61 | Female | Current | 45  | 14 | Surgery Only    | NSCLC  | Indeterminate |
| 64 | Male   | Former  | 60  | 10 | Surgery Only    | Benign | Indeterminate |
| 52 | Female | Former  | 15  | 9  | Biopsy & Surger | NSCLC  | Indeterminate |
| 64 | Female | Never   | NA  | 13 | Surgery Only    | Benign | Indeterminate |
| 51 | Male   | Former  | 25  | 19 | Surgery Only    | Benign | Indeterminate |
| 60 | Female | Former  | 10  | 15 | Biopsy & Surger | NSCLC  | Likely Benign |
| 74 | Male   | Former  | 24  | 23 | Biopsy Only     | Benign | Likely Benign |
| 66 | Female | Former  | 38  | 10 | Surgery Only    | NSCLC  | Indeterminate |
| 56 | Male   | Former  | 15  | 11 | Surgery Only    | NSCLC  | Likely Benign |
| 73 | Female | Former  | 30  | 11 | Surgery Only    | NSCLC  | Likely Benign |
| 70 | Male   | Former  | 50  | 13 | Surgery Only    | NSCLC  | Likely Benign |
| 58 | Female | Former  | 30  | 19 | Surgery Only    | NSCLC  | Likely Benign |
| 69 | Male   | Former  | 40  | 27 | Surgery Only    | Benign | Indeterminate |
| 72 | Male   | Former  | 80  | 22 | Biopsy Only     | NSCLC  | Indeterminate |
| 78 | Female | Former  | 50  | 30 | Surgery Only    | NSCLC  | Indeterminate |
| 74 | Female | Former  | 60  | 8  | Surgery Only    | NSCLC  | Indeterminate |
| 67 | Female | Former  | 44  | 11 | Surgery Only    | NSCLC  | Indeterminate |
| 65 | Male   | Former  | 5   | 24 | Surgery Only    | NSCLC  | Indeterminate |
| 68 | Female | Current | 40  | 11 | Surgery Only    | NSCLC  | Indeterminate |
| 70 | Female | Current | 72  | 13 | Biopsy & Surger | NSCLC  | Indeterminate |
| 77 | Female | Former  | 13  | 14 | Surgery Only    | NSCLC  | Indeterminate |

|    |        |         |     |    |                 |        |               |
|----|--------|---------|-----|----|-----------------|--------|---------------|
| 69 | Female | Never   | NA  | 20 | Biopsy & Surger | NSCLC  | Indeterminate |
| 75 | Female | Former  | 25  | 15 | Surgery Only    | Benign | Indeterminate |
| 69 | Male   | Former  | 75  | 25 | Surgery Only    | NSCLC  | Indeterminate |
| 76 | Female | Former  | 71  | 14 | Biopsy & Surger | NSCLC  | Indeterminate |
| 69 | Female | Former  | 80  | 8  | Surgery Only    | NSCLC  | Indeterminate |
| 61 | Male   | Former  | 93  | 8  | Surgery Only    | NSCLC  | Indeterminate |
| 79 | Male   | Never   | NA  | 16 | Surgery Only    | NSCLC  | Likely Benign |
| 74 | Male   | Former  | 27  | 11 | Surgery Only    | NSCLC  | Likely Benign |
| 63 | Female | Never   | NA  | 20 | Biopsy & Surger | Benign | Indeterminate |
| 87 | Female | Never   | NA  | 11 | Surgery Only    | Benign | Indeterminate |
| 87 | Male   | Never   | NA  | 23 | Biopsy & Surger | NSCLC  | Likely Benign |
| 63 | Female | Never   | NA  | 22 | Biopsy & Surger | NSCLC  | Likely Benign |
| 78 | Female | Never   | NA  | 13 | Surgery Only    | NSCLC  | Indeterminate |
| 64 | Female | Never   | NA  | 18 | Surgery Only    | NSCLC  | Likely Benign |
| 71 | Female | Former  | 40  | 23 | Surgery Only    | Benign | Indeterminate |
| 79 | Male   | Never   | NA  | 30 | Biopsy & Surger | NSCLC  | Indeterminate |
| 46 | Female | Current | 5   | 18 | Surgery Only    | NSCLC  | Indeterminate |
| 67 | Female | Former  | 10  | 19 | Surgery Only    | NSCLC  | Indeterminate |
| 45 | Male   | Former  | 0.5 | 8  | Surgery Only    | Benign | Indeterminate |
